# Supplementary material for: Horizontal molecular orientation of light-emitting oligofluorenes in spin-coated glassy organic thin films
Source: Royal Society of Chemistry journal article supplement (doi:10.1039/c6tc02861f), 2016-01-01
Supplement: c6tc02861f1.pdf [file c6tc02861f1.pdf]

## Supporting information

### Horizontal molecular orientation of light-emitting oligofluorenes in solution-processed glassy organic thin films

L. Zhao, T. Komino, D.H. Kim, M. H. Sazzad, D. Pitrat, J.C. Mulatier, C. Andraud, J.C. Ribierre and C. Adachi

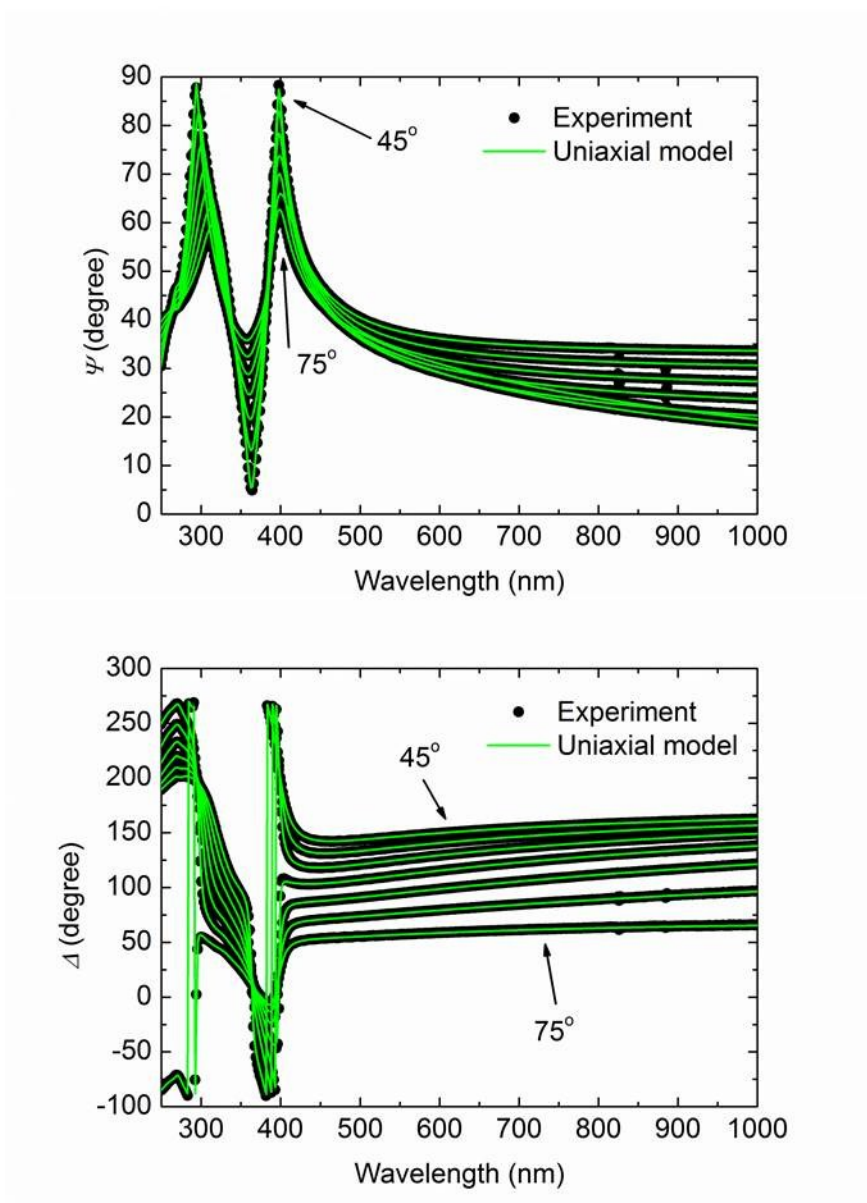

**Fig. S1** Experimental and simulated ellipsometric  $\Psi$  and  $\Delta$  data measured at different angles of incidence for a neat film of terfluorene(C6).

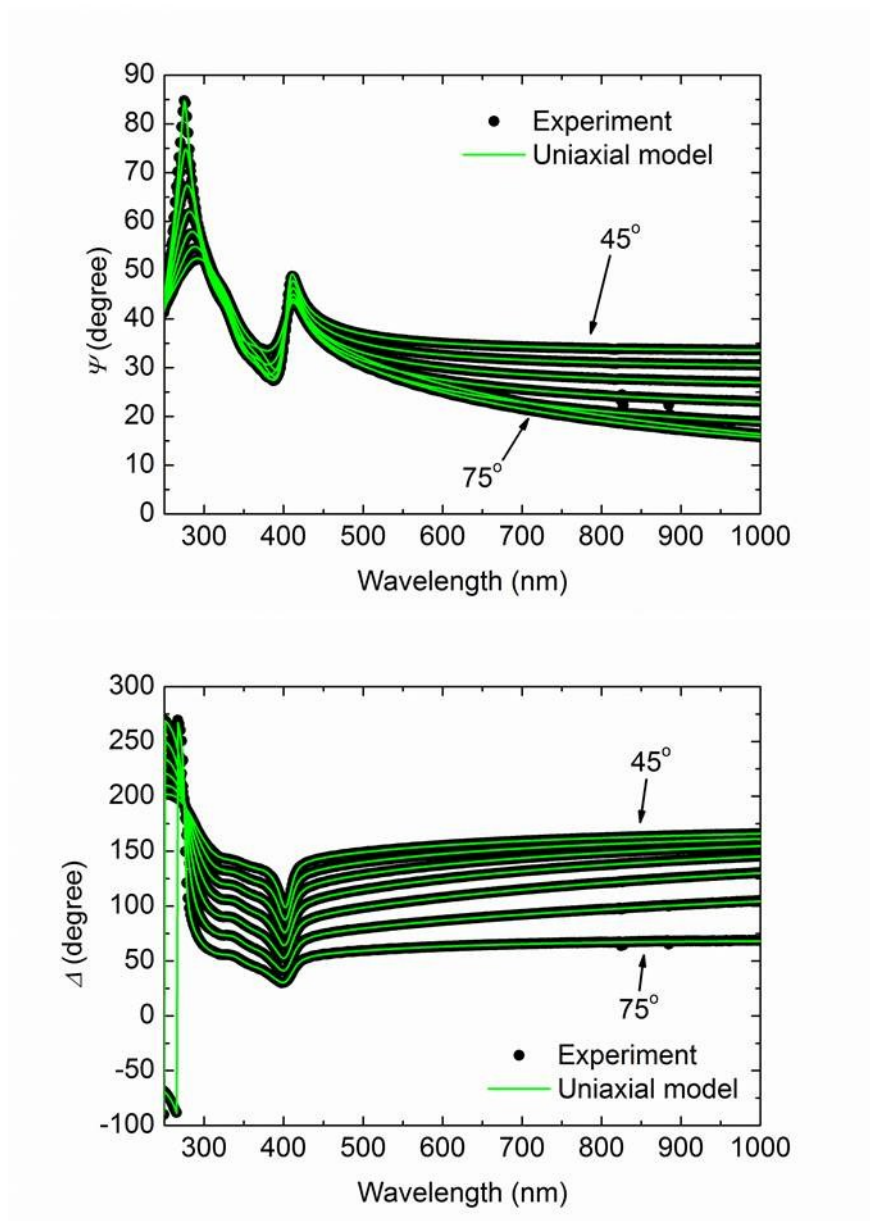

**Fig. S2** Experimental and simulated ellipsometric  $\Psi$  and  $\Delta$  data measured at different angles of incidence for a neat film of pentafluorene.

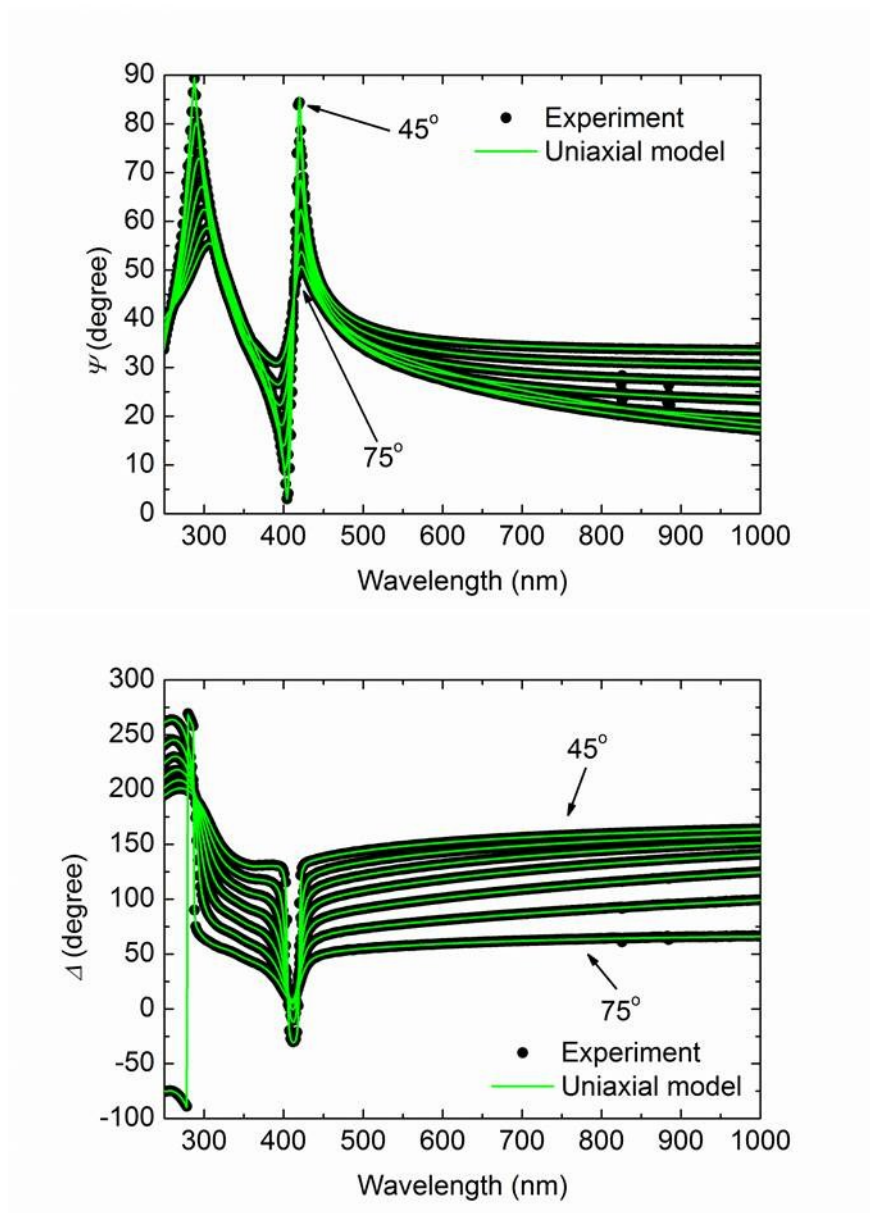

**Fig. S3** Experimental and simulated ellipsometric  $\Psi$  and  $\Delta$  data measured at different angles of incidence for a neat film of octafluorene.

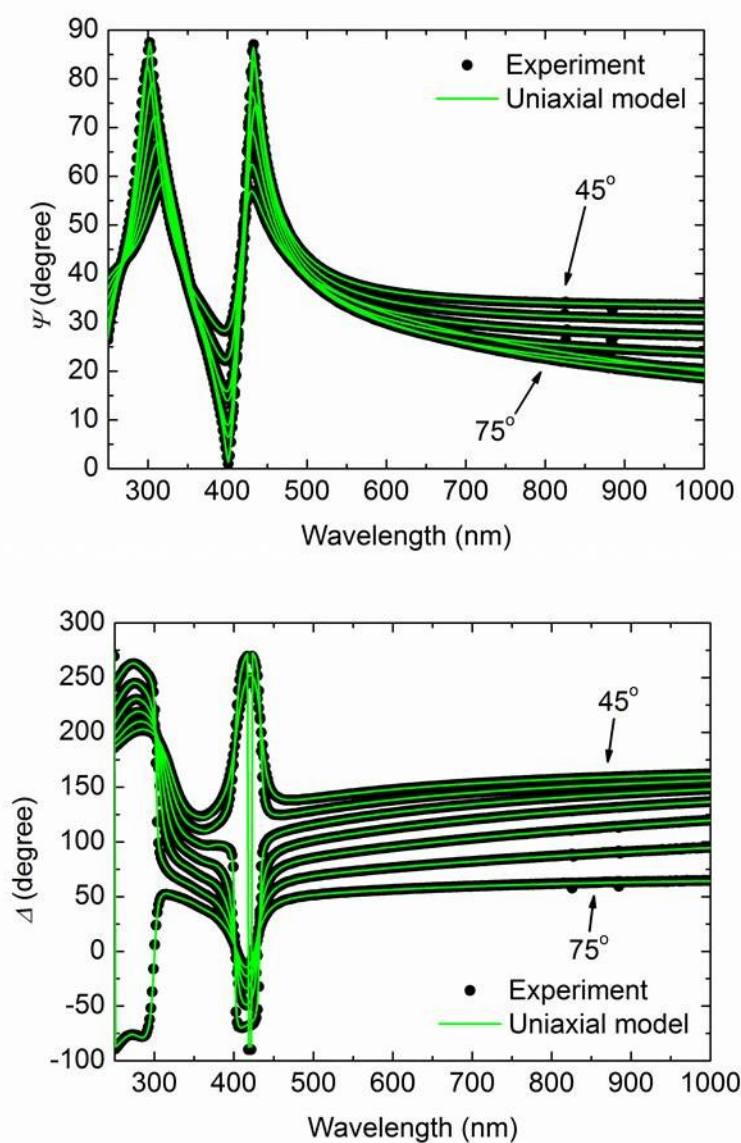

**Fig. S4** Experimental and simulated ellipsometric  $\Psi$  and  $\Delta$  data measured at different angles of incidence for a neat film of decafluorene.
